# Supplementary material
Source: Springer Nature journal article supplement (https://www.springermedizin.de/resource/supplementary/12889_2010_2806_MOESM6_ESM.pdf/9488884)
Supplement: MOESM6 [file 9488884]

Articles retrieved from electronic database search (n=436)

+

Publications, reports, opinion polls found through key organisation website search (n=21)

Articles excluded by title, abstract or duplication (n=417)

Full articles assessed (n=40)

Studies excluded according to inclusion/exclusion criteria (n=19)

**Inclusion:**

- study participants sampled from “general public” or relevant sub-populations e.g. high/low risk drinkers
- research conducted in Australia from 1998 onwards
- all levels of evidence and study designs (including opinion polls)

**Exclusion:**

- samples not representative of the general population e.g. lobby group member, hotel proprietor
- study designs where sampling is self-selected rather than random

Studies included in review (n=21)
